# Supplementary material for: Crowdsourcing image analysis for plant phenomics to generate ground truth data for machine learning
Source: PubMed Central journal article supplement (PMC6085066; doi:10.1371/journal.pcbi.1006337), 2018-07-30
Supplement: pcbi.1006337.s001.pdf [file pcbi.1006337.s001.pdf]

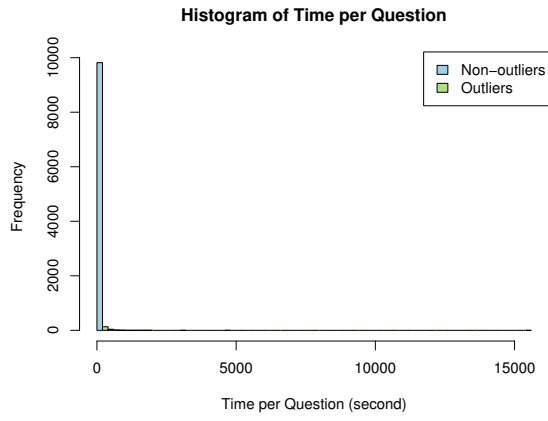

(a)

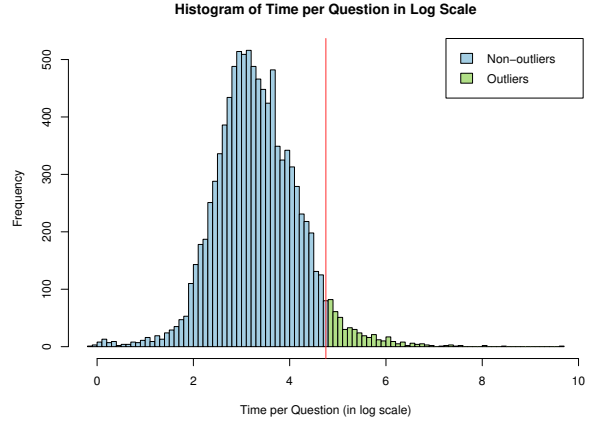

(b)

**Histograms of time consumption before and after log transformation.**
