# Supplementary material for: Crowdsourcing image analysis for plant phenomics to generate ground truth data for machine learning
Source: PubMed Central journal article supplement (PMC6085066; doi:10.1371/journal.pcbi.1006337), 2018-07-30
Supplement: pcbi.1006337.s003.pdf [file pcbi.1006337.s003.pdf]

|                  | Estimate ( $\hat{\beta}$ ) | Standard Error | p-value  |
|------------------|----------------------------|----------------|----------|
| Master MTurk     | -0.00008                   | 0.000038       | 0.0457   |
| non-Master MTurk | -0.00027                   | 0.000035       | < 0.0001 |
| Course Credit    | -0.00095                   | 0.000092       | < 0.0001 |

**Parameter estimates in linear mixed effects regression of accuracy over time.**
